# Supplementary material for: sRNAflow: A Tool for Analysis of Small RNA-Seq Data
Source: Preprints.org preprint supplement (doi:10.20944/preprints202401.0095.v1), 2024-01-03
Supplement: Supplementary file 1 [file supplementary]

## Sheet: Example genomeless
edgeR LibSize quasi-likelihood F-tests

## Sheet: ClustalW
row.names
